# Supplementary material for: Structural analyses of adenylate kinases from Antarctic and tropical fishes for understanding cold adaptation of enzymes
Source: PubMed Central journal article supplement (PMC5700098; doi:10.1038/s41598-017-16266-9), 2017-11-22
Supplement: 41598_2017_16266_MOESM1_ESM.pdf [file 41598_2017_16266_MOESM1_ESM.pdf]

# **Structural analyses of adenylate kinases from Antarctic and tropical fishes for understanding cold adaptation of enzymes**

Sojin Moon, Junhyung Kim, and Euiyoung Bae

Supplementary Figures S1 to S6

## AKNc

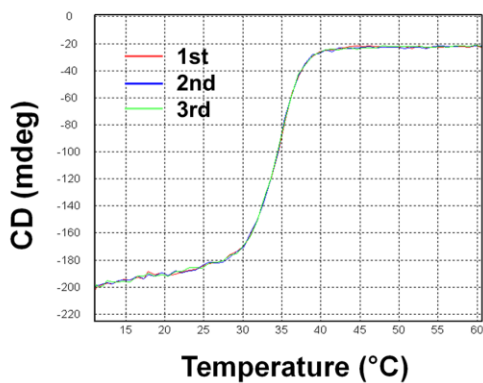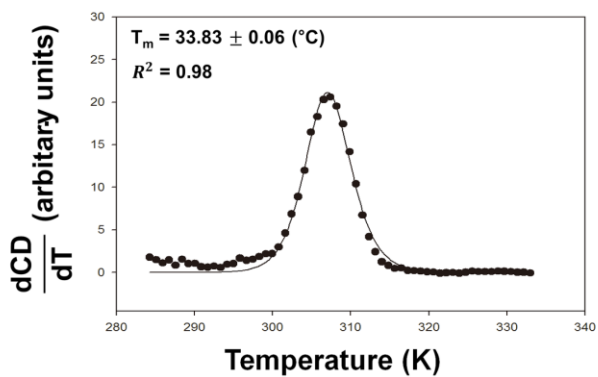

## AKNc V28I

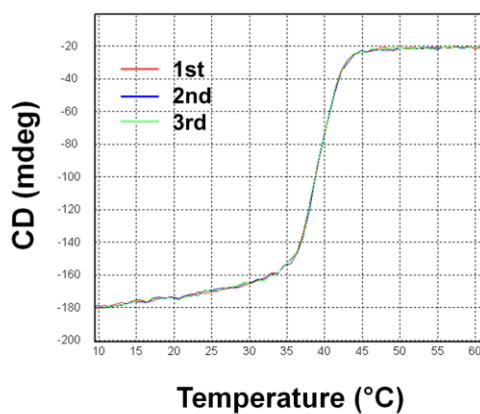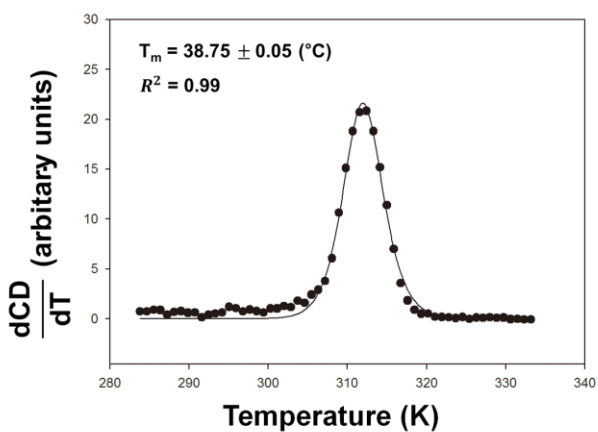

## AKNc S48A

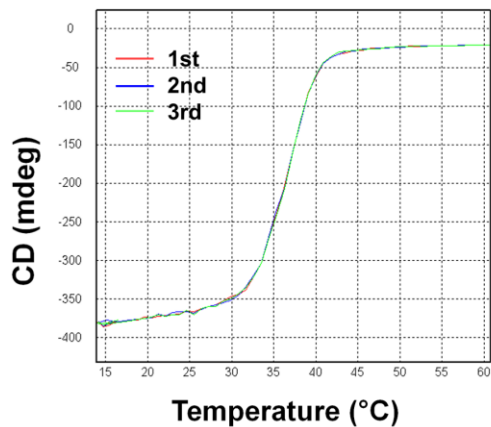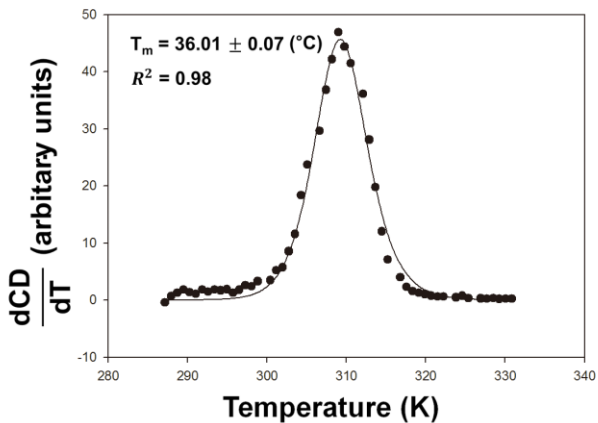

### AKNc V118I

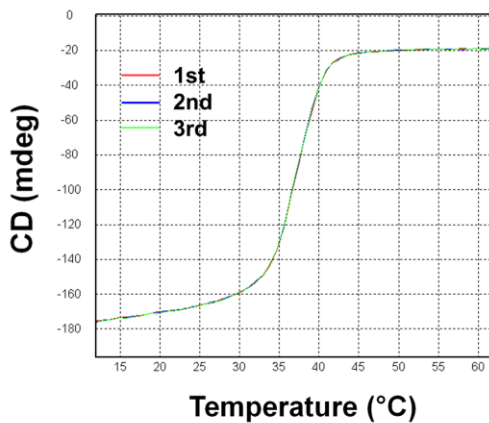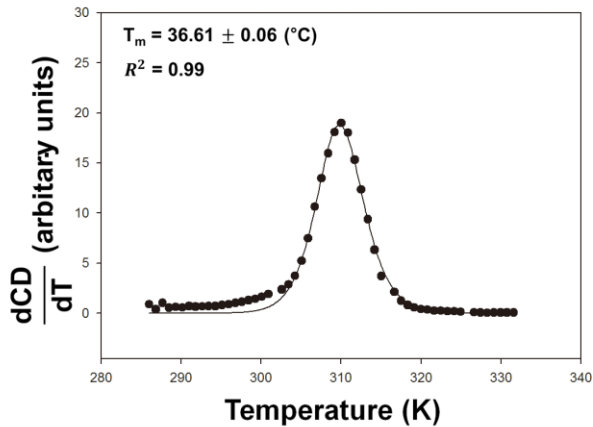

### AKNc V173I

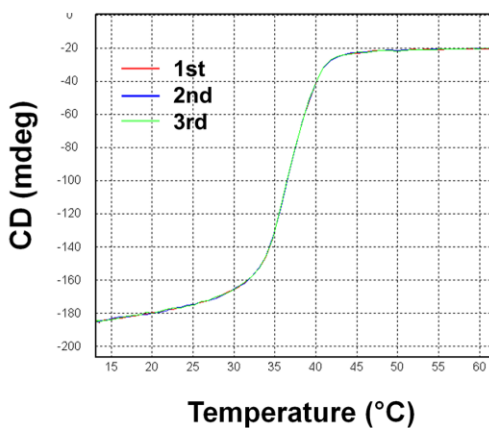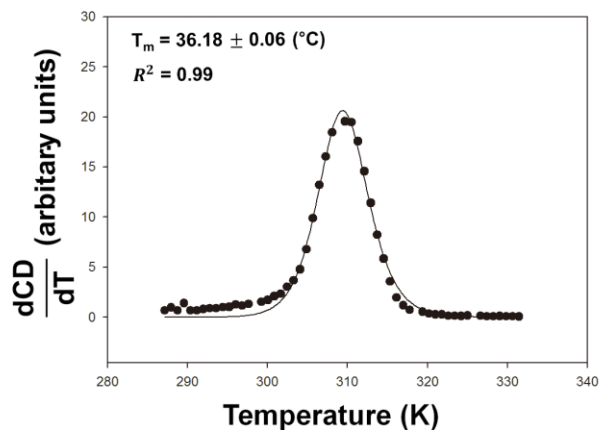

### AKNc T188K

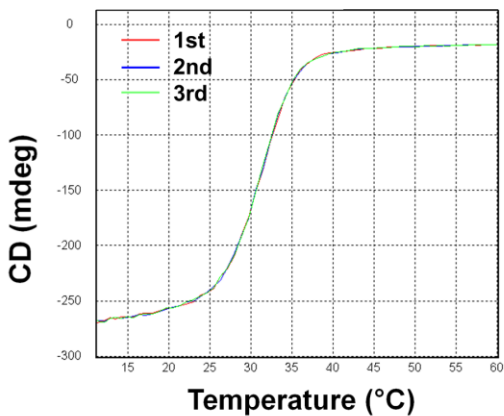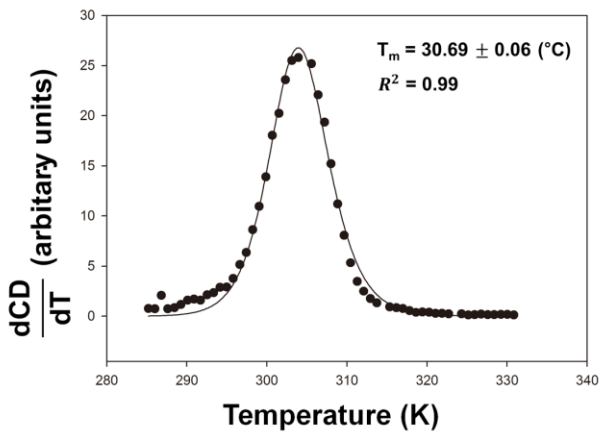

### AKNc V118I/V173I

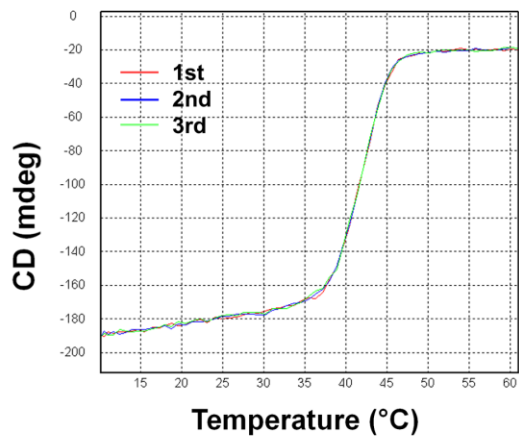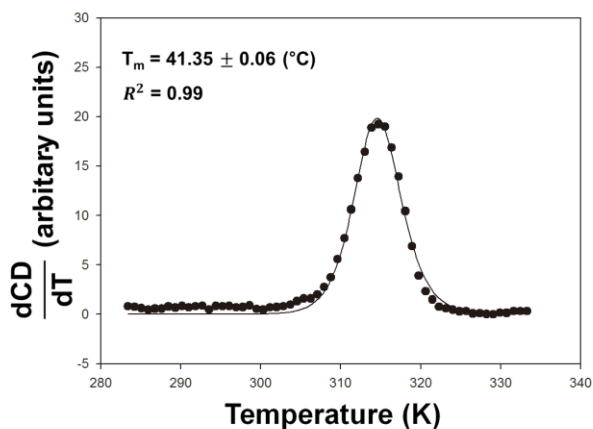

### AKNc V28I/V118I/V173I

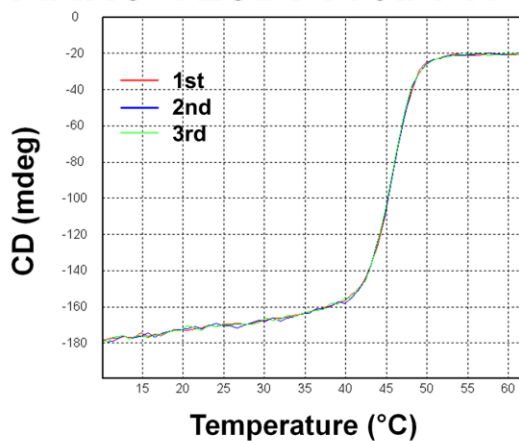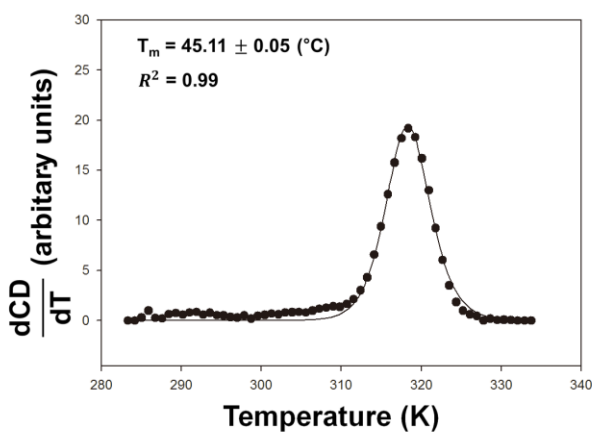

### AKPr

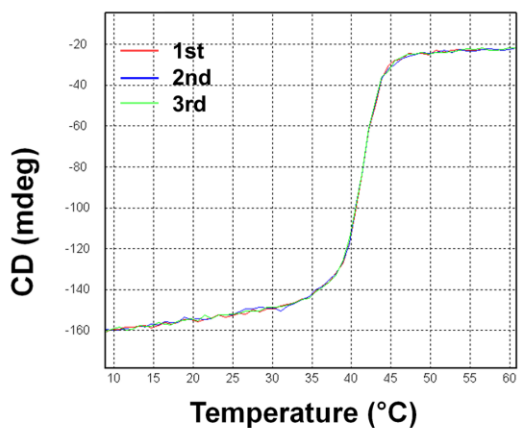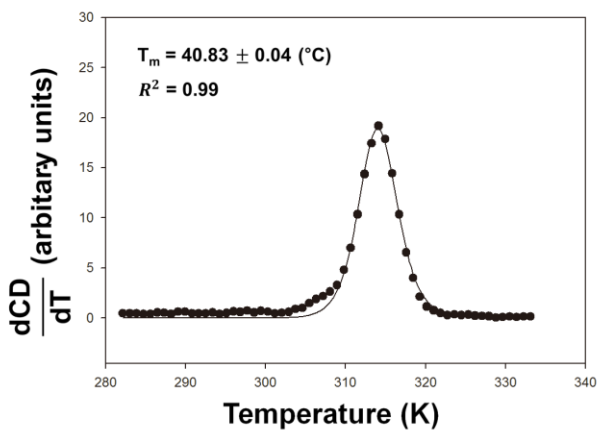

## AKXm

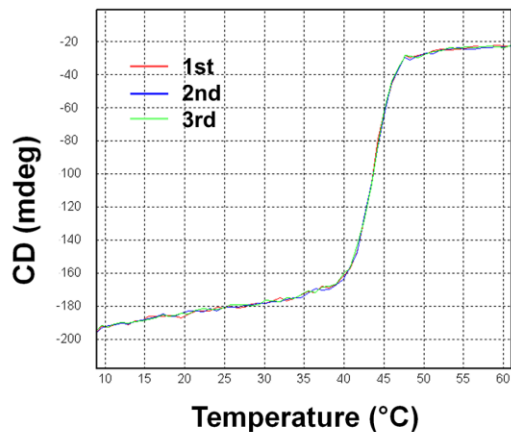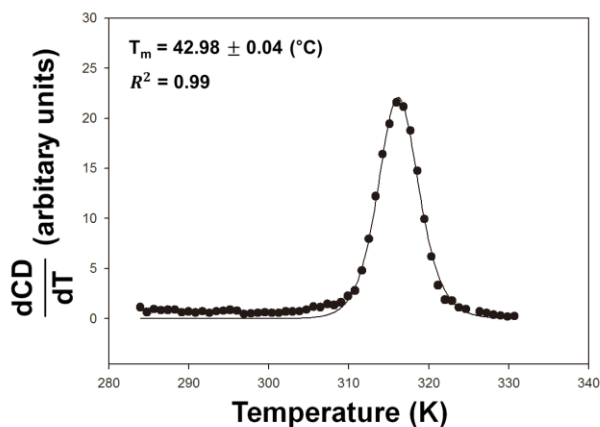

## AKDr

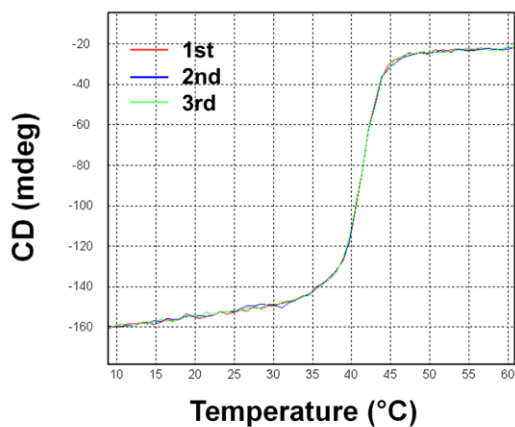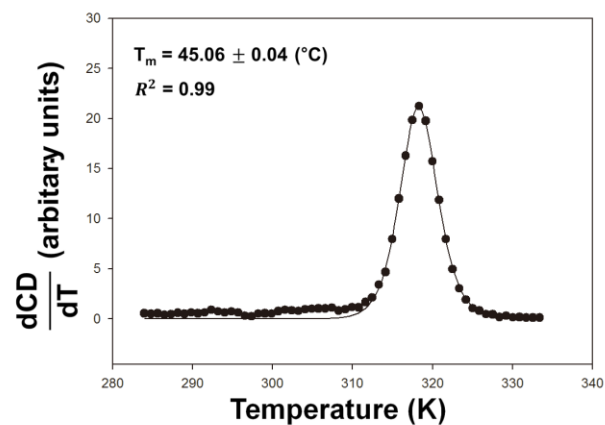

## AKDr I28V/I118V/I173V

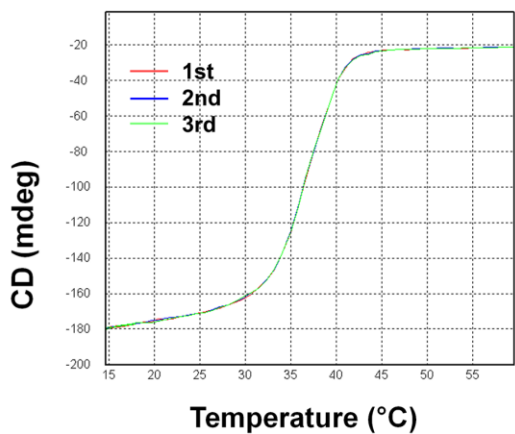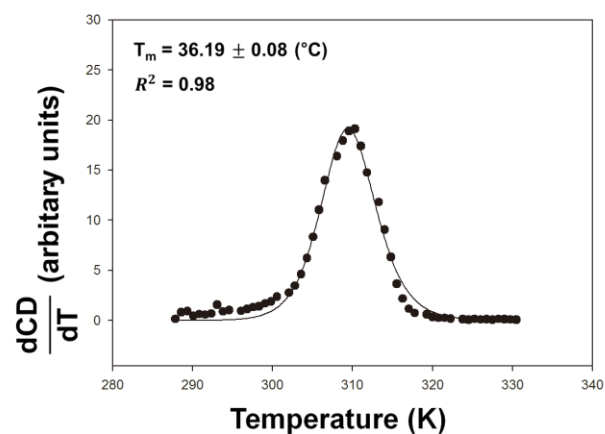

### AKNc + Ap<sub>5</sub>A

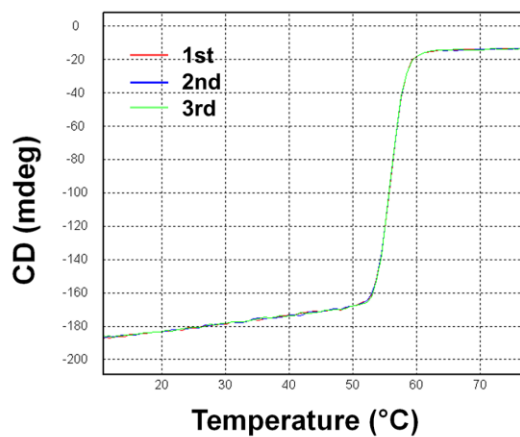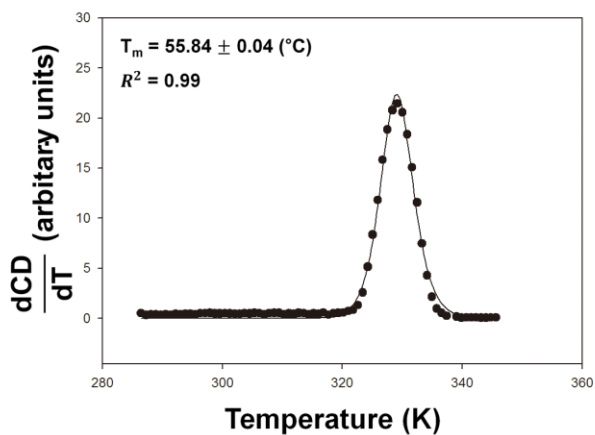

### AKNc V28I/V118I/V173I + Ap<sub>5</sub>A

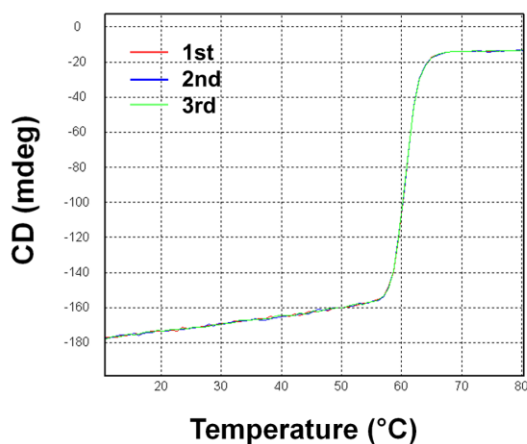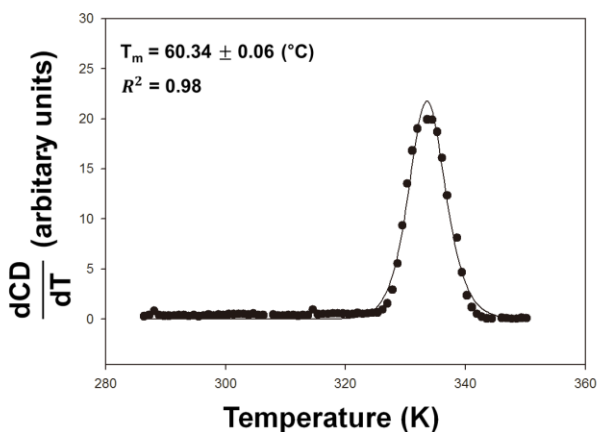

### AKDr + Ap<sub>5</sub>A

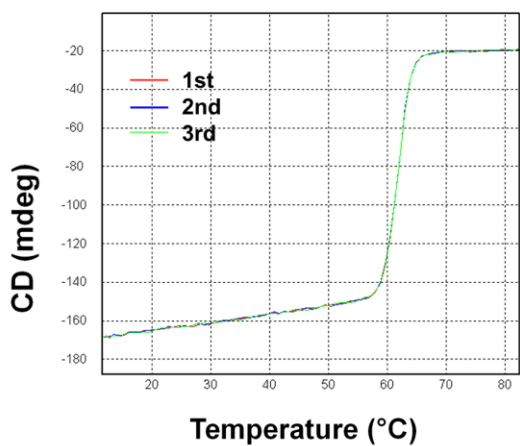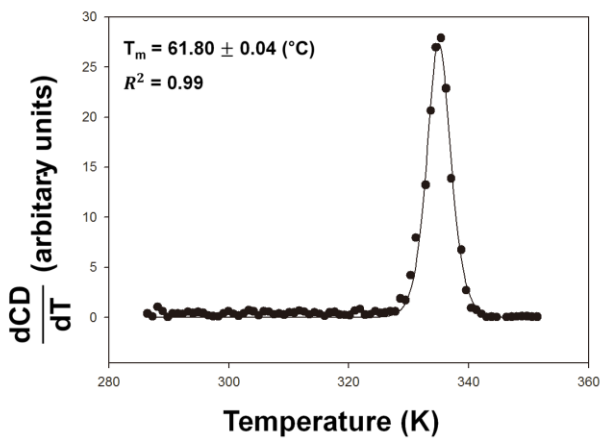

## AKDr I28V/I118V/I173V + Ap<sub>5</sub>A

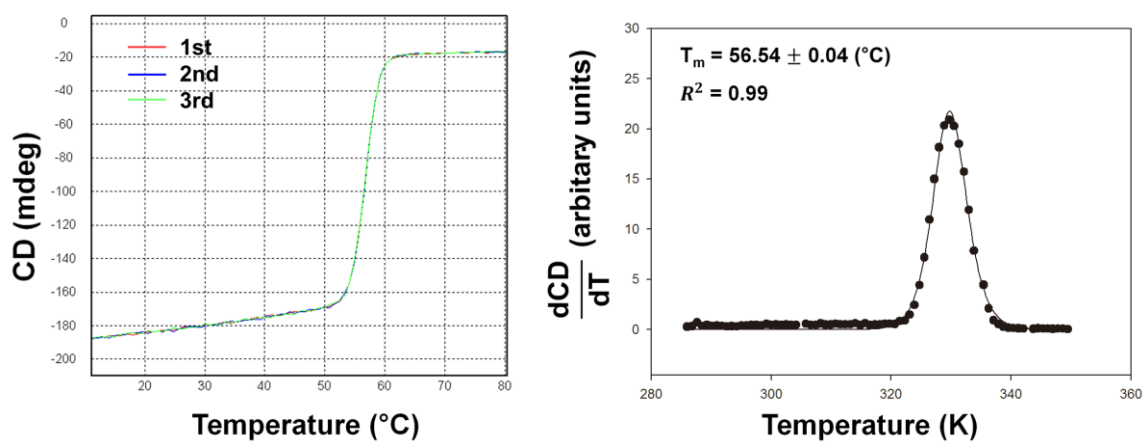

**Figure S1.** Thermal denaturation of AKs measured by CD spectroscopy. Original CD data (left) show three CD measurements of the samples at each temperature. Average values of the three measurements were differentiated to yield differential denaturation curves (right). Solid lines represent best fits to a two-state transition model for the differential denaturation curves.  $T_m$ 's are indicated with their standard errors for the best-fit values in the non-linear regression.  $R^2$  values of the regression are also indicated.

Supplementary Figure S2

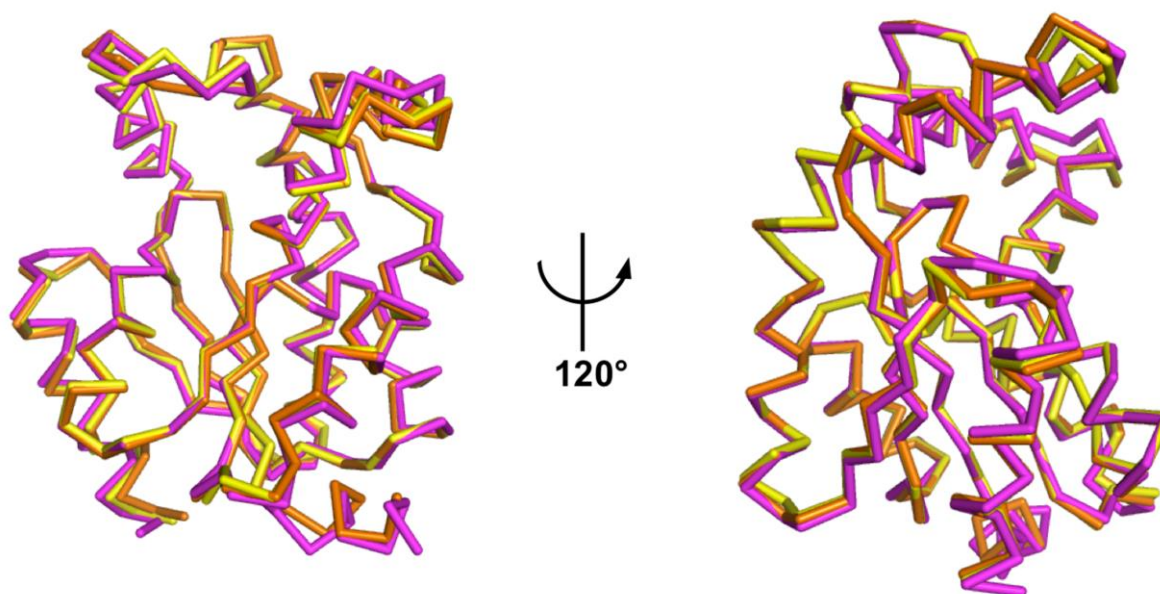

**Figure S2.** Structural alignment of AK1 homologues. AKNc, AKDr, and human AK1 (Protein Data Bank code 1Z83) are shown in yellow, orange, and magenta, respectively.



Supplementary Figure S3

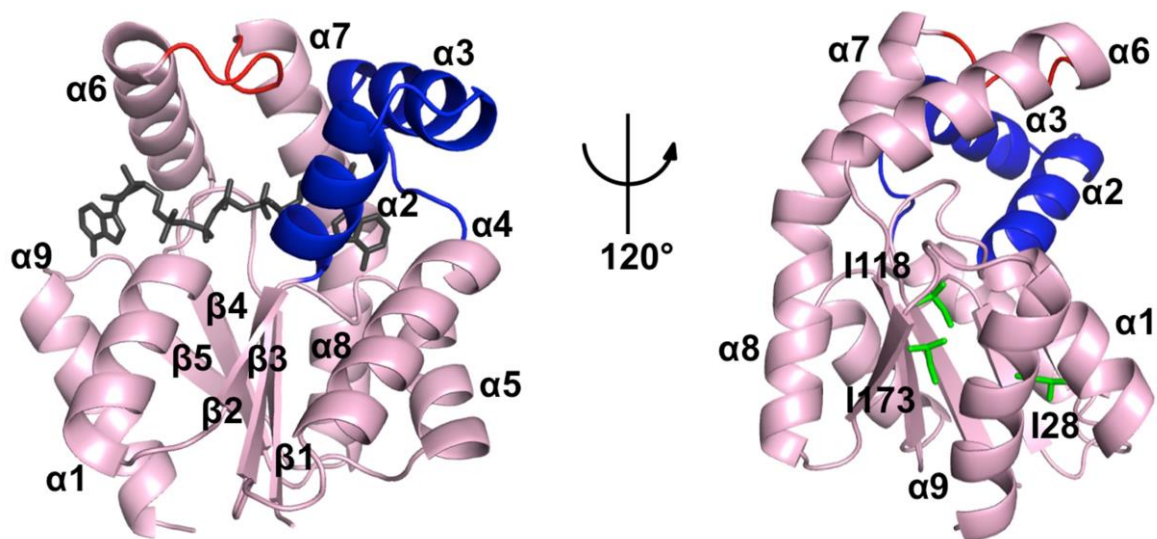

**Figure S3.** Overall structure of the V28I/V118I/V173I mutant of AKNc. The CORE (residues 1–38, 69–136, and 143–193), AMP<sub>bind</sub> (residues 39–68), and LID (residues 137–142) domains are shown in pink, blue, and red, respectively. The bound Ap<sub>5</sub>A molecules are shown in black (left). The mutated Ile residues are highlighted in green in stick representations (right).

Supplementary Figure S4

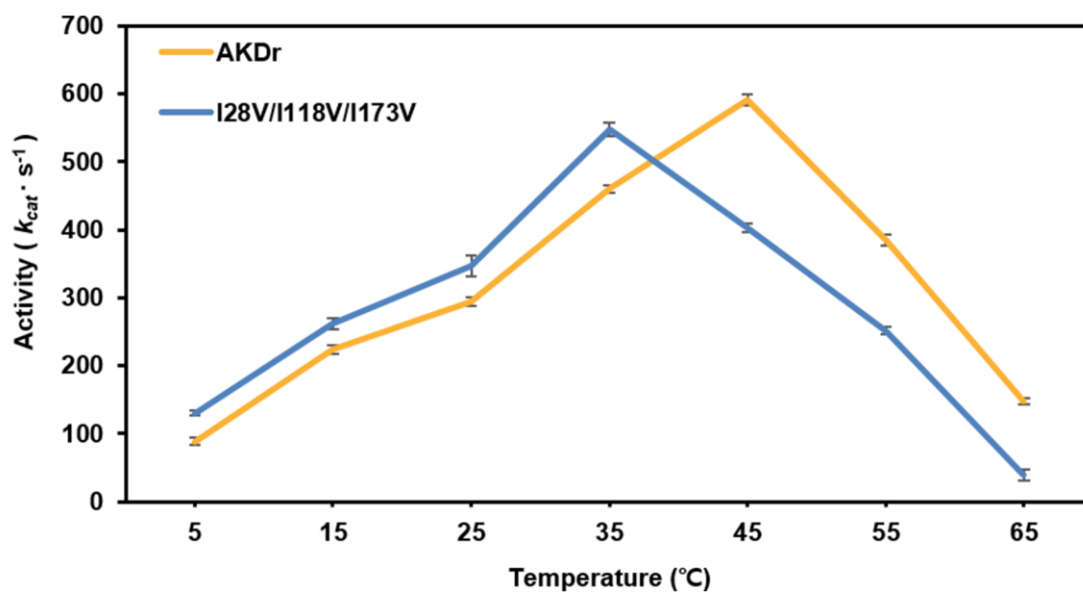

**Figure S4.** Temperature dependence of activity of WT AKDr and the I28V/I118V/I173V mutant. The activities in the direction of ATP formation were measured at various temperatures. At each temperature, three independent measurements were made. Data are represented as mean  $\pm$  standard error of mean.

Supplementary Figure S5

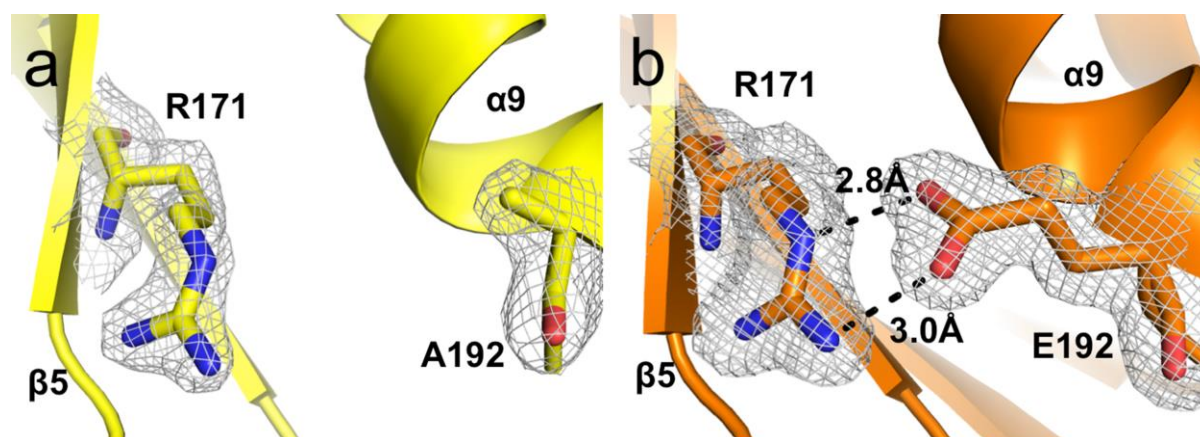

**Figure S5.** Interaction between residues 171 and 192 in AKNc (a) and AKDr (b). AKNc has Arg171 and Ala192. AKDr has Arg171 and Glu192, which form a salt bridge. The  $2mF_{obs} - DF_{calc}$  map is contoured at  $1.0 \sigma$ .

Supplementary Figure S6

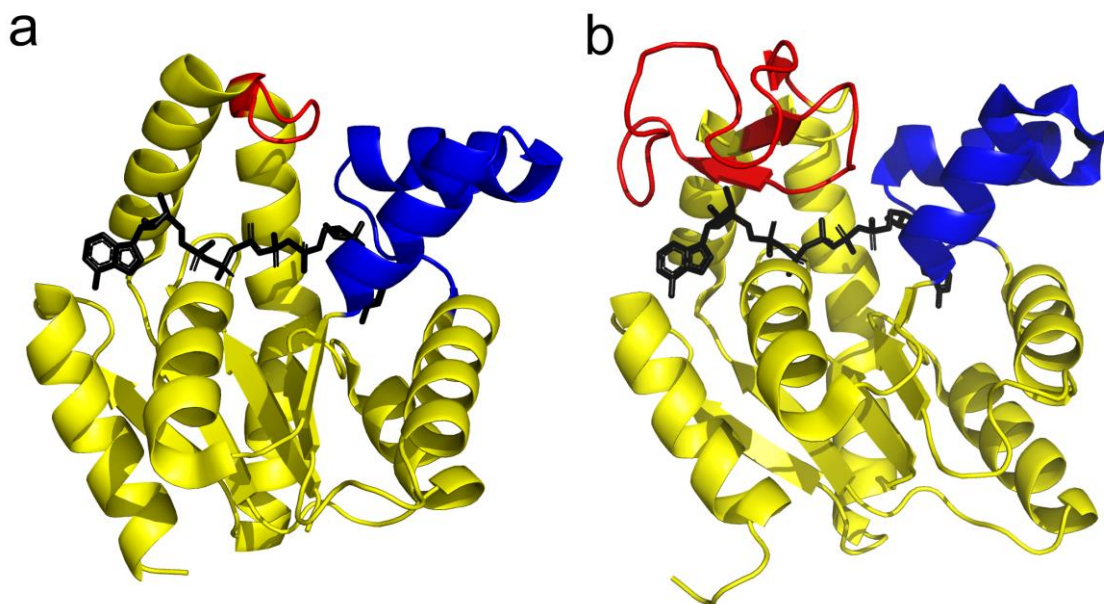

**Figure S6.** Structural comparison of AKNc and a bacterial AK with a long LID domain. Crystal structures of AKNc (**a**) and AK from a psychrophilic bacterium, *Bacillus globisporus* (**b**; Protein Data Bank code 1S3G). The CORE, AMP<sub>bind</sub>, and LID domains are shown in yellow, blue, and red, respectively. Ap<sub>5</sub>A molecules are shown in black.
